1 Study protocol for a systems evaluation of an infant mental health service: integration of  
2 'Little Minds Matter' into the early years system

3

4

5 Sarah Masefield<sup>1</sup>, Alison Ellwood<sup>2\*</sup>, Sarah Blower<sup>1</sup>, Josie Dickerson<sup>2</sup>, Rachael H. Moss<sup>2</sup>, Sara  
6 Ahern<sup>2</sup>

7

8 <sup>1</sup> Department of Health Sciences, University of York, York, North Yorkshire, UK

9 <sup>2</sup> Born in Bradford, Bradford Teaching Hospitals National Health Service Foundation Trust,  
10 Bradford, West Yorkshire, UK

11

12 \*Corresponding author

13 e.mail: [alison.ellwood@bthft.nhs.uk](mailto:alison.ellwood@bthft.nhs.uk)

## 15 **Abstract:**

16 Infant Mental Health relates to how well a child develops socially and emotionally from birth  
17 to age three. There is a well-established link between parent-infant relationship quality,  
18 Infant Mental Health, and longer-term social and emotional development, however, there is  
19 a lack of evidence-based interventions that support the parent-infant relationship and/or  
20 protect against poor Infant Mental Health. Little Minds Matter is a specialist Infant Mental  
21 Health service developed in Bradford (UK) to support parent-infant relationships by  
22 providing training and consultation for professionals and direct clinical work to families. The  
23 efficacy of this intervention will depend upon how well it becomes embedded within the  
24 early years system. This study aims to apply a systems approach to evaluate this service and  
25 provide a perspective on the challenges to embedding a complex service within a healthcare  
26 system. Multiple methods will be used to investigate embeddedness within the wider early  
27 years system. Routine collected quantitative data about the service will be used to develop  
28 a system map showing interaction with related services. Qualitative data will be collected  
29 through interviews with individuals involved in the design and provision of the Little Minds  
30 Matter service, and professionals working within the early years system. Framework  
31 analysis will be used to analyse the data inductively and deductively within a systems  
32 approach. The findings from this study will provide evidence for the ongoing  
33 implementation of the Little Minds Matter Service for providers and commissioning bodies.  
34 Exploring this methodological approach to evaluation will have application more broadly for  
35 researchers evaluating complex interventions and services within a wider system.

## 36 **Introduction:**

37 Infant mental health (IMH) relates to how well a child develops socially and emotionally  
38 from birth to age three [1]. Secure parent-infant relationships are the foundation for  
39 protecting IMH [2]. If an infant feels safe and secure, and experiences the world as a  
40 consistent, loving place, they are more likely to build a healthy brain and grow into a  
41 confident person who enjoys happy relationships [3]. The association between parent-infant  
42 relationship quality, IMH, and children's longer term social and emotional development is  
43 now well evidenced [2,4-6. Despite this, there is a lack of evidence-based interventions that  
44 support the parent-infant relationship [3, 7] and/or protect against poor IMH [8].

45 In their recent evidence report, the Parent-Infant Foundation identified a 'baby blind-spot'  
46 within current Child and Adolescent Mental Health Service provision in England, with many  
47 services not accepting referrals for children under 2 years, thereby missing opportunities to  
48 intervene at the earliest opportunity [9]. The Parent-Infant Foundation consensus statement  
49 recommends improving outcomes in the first 1,001 days of a child's life, establish specialist  
50 IMH services at a local level and provide care continuity with a skilled workforce [10]. There  
51 are currently 45 such specialist parent-infant relationship or infant mental health teams in  
52 the UK offering theoretically grounded interventions in their therapeutic provision [11]. In  
53 order to provide support to those families in need, these services need appropriate referrals  
54 from professionals working across the early years services who come into contact with  
55 families. However, identification of issues in the parent-infant relationships by these  
56 professionals may be challenging. Whilst NICE guidance highlights the importance of  
57 assessing the relationship parents have with their children, there are no assessment tools

58 recommended for use in the critical first 12 months after birth, and those recommended for  
59 pre-school children require clinical expertise to complete [12]. As a consequence, healthcare  
60 professionals working in universal settings with families with young children may lack the  
61 confidence and/or ability to assess this relationship [13-14].

62 To address these challenges, one such specialist IMH service, Little Minds Matter (LMM),  
63 has been designed to provide direct therapeutic support for the parent-infant relationship  
64 at any time from pregnancy up to 24 months post birth. The aim of the service is to  
65 influence the wider early years system to raise awareness of IMH in the community and  
66 empower professionals to confidently identify issues and support parents within their usual  
67 practice. Success of the intervention depends on becoming embedded within the early years  
68 system, so that relevant services have an awareness of IMH and are able to utilise the  
69 services offered by LMM.

70 The aim of this study protocol is to describe the evaluation of the Little Minds Matter  
71 intervention using a systems evaluation approach.

## 72 **Methods**

### 73 **Design**

74 This is a systems evaluation approach using multi-methods including quantitative and  
75 qualitative data and systems mapping.

## 76 **Study setting**

77 This study is being conducted in Bradford, a large district in the North of England with a  
78 young, ethnically diverse population, many of whom live in areas of high deprivation. The  
79 early years system is defined as all the services that work with families with young children  
80 to promote children's health and development from conception to primary school entry at  
81 age 5. This includes universal care (e.g., midwifery and health visiting), targeted services  
82 (e.g., mental health services and social care) and a wide range of voluntary and charitable  
83 sector (VCS) organisations delivering support and interventions. Significant to the early  
84 years services in Bradford are two large programmes of work providing additional support  
85 to the early years system in inner-city areas: Better Start Bradford, a National Lottery  
86 Community Fund programme that commissions a number of preventative interventions to  
87 improve socio-emotional development, language and communication development and  
88 nutrition in children aged 0-3 [15]; and the Reducing Inequalities in Communities programme  
89 that funds interventions to reduce inequalities across the life course including the early  
90 years [16].

## 91 **The intervention**

92 Little Minds Matter (LMM) is a specialist IMH service developed to support the parent-infant  
93 relationship during pregnancy until the infant is 24 months old. We acknowledge that not all  
94 caregivers are parents in a biological or legal sense, for clarity we also include within the  
95 scope of this paper parents as those who provide daily care to a child, and act as a 'parent'  
96 whether they are biological parents or not [17]. The service is commissioned by both the

97 Better Start Bradford and Reducing Inequalities in Communities programmes and is  
98 delivered by Bradford District Care NHS Foundation Trust. According to the theory of  
99 change for LMM, a key mechanism for an improved parent-infant relationship is *mind-*  
100 *mindedness* which is defined as the ability of parents to tune in to their children’s thoughts  
101 and feelings [18]. The service acts on this mechanism in a number of ways, firstly by raising  
102 awareness across the early years workforce, and wider community, of the importance of the  
103 parent-infant relationship to later child outcomes. Secondly by training and supporting the  
104 early years workforce who work directly with families to identify, and support, families with  
105 ‘concerning’ relationships, and finally by providing direct clinical work with families in need.  
106 The service defines a ‘concerning’ relationship as one where a parent does not appear to be  
107 aware of their infant’s feelings, and are unable to exhibit mind-mindedness. The service is  
108 delivered through four strands of activity described in Figure 1. Strand one is delivered by a  
109 VCS partner and strands two, three and four are delivered by a team of approximately 10  
110 professionals. This includes Clinical Psychologists, Family Therapists and those with a  
111 background in Health Visiting, Midwifery and Social Care settings. The service has  
112 undergone a thorough service design, including a theory of change, logic model and agreed  
113 implementation targets for each strand for which routine monitoring data is gathered.  
114 Further information relating to this design process can be requested from the corresponding  
115 author.

116 [Insert] Figure 1: Overview of Little Minds Matter service

## 117 **A Systems approach to evaluation**

118 The Medical Research Council updated their guidance for evaluating complex interventions  
119 in 2021, advocating for consideration of the context within which an intervention operates  
120 including the conditions needed to realise the mechanisms for change [19]. In a systems  
121 approach to evaluating health interventions, interventions are conceptualised as ‘events in  
122 systems that either leave a lasting footprint or wash out depending on how well the  
123 dynamic properties of the system are harnessed’ [19]. An essential initial component of a  
124 systems approach is exploring and understanding the context into which the intervention is  
125 introduced and with which it interacts, essentially the pre-intervention context.  
126 Additionally, mapping of the system of interest is often a preliminary but integral part of a  
127 systems evaluation. The pre-intervention context and system map are then used as key  
128 tools in the systems approach to enable four avenues of inquiry: 1) how the intervention  
129 couples with the context; 2) tracking changes in relationships within the system; 3) the  
130 distribution and transformation of existing resources; and 4) the displacement of pre-  
131 intervention activities [20]. Using this approach the study aims to look at how the  
132 intervention and the early years system have changed over time in relation to IMH, and the  
133 dynamic relationship of these changes.

134 Using implementation data and qualitative interviews with stakeholders, the objectives of  
135 the study are to explore and describe:

- 136 • What the early years system looked like before LMM was implemented (i.e., the pre-  
137 intervention context).

- 138 • Changes that have occurred in the early years system since LMM was first  
139 introduced, to include the displacement of any pre-intervention activities and  
140 transformation of existing resources.
- 141 • The ways in which LMM has become embedded within (i.e., coupled with) the early  
142 years system.
- 143 • Factors that have facilitated or hindered the implementation of LMM.
- 144 • Whether LMM has succeeded in increasing the knowledge and understanding of  
145 IMH in professionals working within the early years system.

## 146 **Development of a system map**

147 To describe the early years system in Bradford and identify key stakeholders to participate  
148 in interviews we will conduct a scoping exercise to identify early years services and projects  
149 in Bradford. This scoping exercise will involve exploring existing pathways within the early  
150 years system and conversations with stakeholders including health and social care  
151 professionals, researchers and those involved in the LMM service design process. From this  
152 we will produce a list of services and projects that work with families in the early years  
153 system to promote children’s health and development. These services and projects will then  
154 be placed into a systems map, with services and projects placed in concentric circles, based  
155 upon the degree to which supporting the parent-infant relationship is a core objective of  
156 that service’s remit (see Figure 2). Implementation data is routinely collected about which  
157 organisations and professional groups have interacted with LMM via the training,  
158 consultation and clinical work strands since the service’s launch. This quantitative data will



159 then be plotted onto the system map to provide a visual description of the way in which  
160 services and professionals have engaged with LMM.

161 [Insert] Fig 2: Example template map

## 162 **Qualitative Data collection:**

163 The systems map will then be used within qualitative interviews to help elucidate the pre-  
164 intervention context, the fit of LMM within the system and the extent of interaction  
165 between services and LMM and facilitate other lines of questioning. Qualitative data  
166 collection will be undertaken with three different groups of stakeholders: group one,  
167 individuals involved in the development of LMM; group two, individuals employed by LMM  
168 but not involved in service design; group three, individuals employed in roles supporting  
169 families with young children (see Figure 3). Data will be obtained using interviews and focus  
170 groups as appropriate. For groups two and three, interviews will be undertaken at two time  
171 points to observe change in the system over time. Interviews will take place face-to-face or  
172 through video conferencing depending on the participant's choice. To report our qualitative  
173 findings, we will adhere to the Standards for Reporting Qualitative Research (SRQR) and the  
174 COnsolidated criteria for REporting Qualitative research (COREQ) [21].

175 [Insert] Fig 3: Data collection process

## 176 **Participants:**

177 Study participants are eligible for interview if they are an individual working within the early  
178 years system, who is either:

179       • Employed by the National Health Service (NHS), social care, Better Start Bradford  
180           and related organisations/projects, local authority, and VCS in a service which  
181           supports the parent-infant relationship.

182           OR

183       • Were involved in the design and development of the LMM service.

184   We aim to recruit between 25-35 participants at each time point: four in group one;  
185   approximately seven in group two and 25 in group three. Group one participants are  
186   identified by liaising with the Better Start Bradford team; group two participants will be  
187   identified by the clinical lead of LMM and recruitment to group three will be dependent on  
188   the services identified in the systems map and interviews with participants in group one and  
189   group two. Sampling will be purposive, targeting staff working at the team lead or  
190   managerial level in organisations that are considered most appropriate in order to gain  
191   organisational oversight and a wider view of service integration and training within  
192   the team. In most cases only one person per service will be interviewed and interviews with  
193   participants from services with a remit to support the parent-infant relationship will be  
194   prioritised (i.e., those in the inner circles of the systems map, see Figure Two). This approach  
195   will support data saturation given the range of participation from varied projects.

196   The study participants will be approached by email from the primary Researchers (SM and  
197   AE). Email addresses will be accessed through contacts with the Better Start Bradford and  
198   Little Minds Matters teams as well as contacts within the Better Start Bradford Innovation  
199   Hub following agreement by the relevant research and development offices. Emails will

200 include the consent form and study information sheet. The information sheet includes  
201 details of the full study, indicating which participant groups we intend to approach for a  
202 second interview. Written or verbal consent will be taken prior to interview. Participation  
203 can be face to face or through video call therefore verbal consent will be recorded  
204 separately from the interview and stored in a different location on the Bradford Teaching  
205 Hospital Foundation Trust's online secure archive in password protected folders.

## 206 **Data collection**

207 Data collection will be scheduled to ensure that those involved in the design and  
208 commissioning of LMM and LMM staff are interviewed first. This will allow for review of the  
209 system map (with any significant omissions added or clarifications made prior to the other  
210 interviews) and review of the list of organisations that the researchers intend to invite to  
211 interview in group three. Additionally information will be captured and review of the topic  
212 guides for the subsequent interviews with staff from other services in the early years system  
213 will be undertaken. At times it may be more viable to collect data through focus groups  
214 rather than one-to-one interviews. This decision will be taken pragmatically on a case-by-  
215 case basis according to the preference of the participants. At time point one, all three  
216 groups will be questioned on a range of subjects as described in figure 3, including their role  
217 in the service, understanding of the LMM service, the reach of LMM across the early years  
218 system and interaction between LMM, other services and professional groups. For groups  
219 one and two, a copy of the draft map will be shared with participants prior to their data  
220 collection session. This will enable these participants to review the map in preparation for  
221 questions in the interview about which services have existing relationships with LMM and

222 which additional services it would be desirable to establish relationships with. Group three  
223 will not be asked to review the map as we are only interested in their relationship with LMM  
224 and not with other services in the early years system.

225 At time point two, 9-12 months later, participants from groups two and three will be invited  
226 to attend a second interview or focus group. Wherever possible this will be the same  
227 individuals, agreement to approach participants again will be discussed at the end of their  
228 time one interview, but where these people have moved on an alternative appropriate  
229 individual will be approached. Again they will be asked questions about their service,  
230 understanding of the LMM service, the reach of LMM into and interaction between LMM,  
231 their/other services and professional groups. At this time point group two will also review  
232 the map again, which will now include additional data from the time between qualitative  
233 data collection periods. The review of the map and interview questions will facilitate  
234 exploration of change in the early years system over the intervening period. Separate topic  
235 guides have been created for the different groups and will be used by the member of the  
236 research team conducting each interview. The topic guides may be amended following  
237 piloting. With this approach we will achieve a whole-system perspective, including an  
238 understanding of the pre-intervention context.

## 239 **Ethical Approval and Study Governance**

240 Health Research Authority (HRA) approval was granted on 25<sup>th</sup> August 2022 (IRAS project ID:  
241 311645 REC reference: 22/HRA/3477) for research undertaken within the NHS Trusts and  
242 Sponsorship approval received for Bradford Teaching Hospitals NHS Foundation Trust on 3<sup>rd</sup>  
243 October 2022 and for Bradford District Care NHS Foundation Trust on 18<sup>th</sup> October 2022 .

244 University of York Department of Health Sciences Research Governance Committee  
245 approval was granted for research undertaken with non-NHS trusts via a Chair's Action  
246 letter (30 September 2022).

## 247 **Data management**

248 Data will be managed confidentially in line with ethical approval. Interviews will be  
249 transcribed and anonymised then the recordings deleted. All data related to the map  
250 development, transcripts and consent information will be stored in the Bradford Teaching  
251 Hospital Foundation Trust online secure archive in password protected folders. Transcripts  
252 will be stored separately from identifiable and consent information. Transcripts will be  
253 managed on Computer Assisted Qualitative Data Analysis Software (CAQDAS) software,  
254 NVivo version 14 (Lumivero, 2023). Transcript data and consents will be stored for ten years  
255 after which time they will be destroyed.

## 256 **Data Analysis**

### 257 **Quantitative Data**

258 Descriptive statistics will provide counts of the number of professionals and organisations  
259 within the early years system who have engaged with each of the strands of the LMM  
260 service.

### 261 **Qualitative Data**

262 Framework analysis will be used to analyse the data using Computer Assisted Qualitative  
263 Data Analysis Software (CAQDAS) software, NVivo. Framework Analysis [22] will be used to

264 organise and analyse the data. This approach is well suited to this study because it is  
265 anticipated that a large amount of data will be generated, requiring a structure to manage  
266 and reduce the data to respond to the research questions. It uses a matrix format to  
267 organise the data into rows or cases (representing participants) and columns (representing  
268 codes) to support comparison of data across, as well as within cases [22].

269 Verbatim transcription will be completed by a transcription service approved by Bradford  
270 Institute for Health Research. Where focus groups are undertaken, we will approach the  
271 data as a group interview transcript analysed in the same way as the individual interview  
272 transcripts. Once transcribed, familiarisation with the data will be increased by reading of  
273 the transcripts while listening to the recorded interview. Once familiarised with the data  
274 three transcripts will be selected, one from each participant group. Using these three  
275 transcripts a coding framework will be developed. Initially codes will be deductively  
276 informed from the existing literature, in addition, two researchers will engage in open  
277 coding to enable themes to emerge from these three interview transcripts. Therefore, the  
278 coding will be both inductively and deductively informed, limiting the extent to which key  
279 findings might be missed. Once developed and agreed the framework will be utilised to  
280 code the remaining transcripts. As with the coding process, themes will be both inductively  
281 and deductively derived through discussion with the wider research team. We will not  
282 employ restrictions on coding, such as stopping analysis in response to data saturation  
283 because of the variety of professionals and services interviewed, new themes and relevant  
284 information may arise in each interview. This process will reduce the potential for bias and  
285 enhance the quality of the analysis.

## 286 Discussion

287 This study will use a multi-methods systems approach, integrating implementation data,  
288 systems mapping and qualitative data to evaluate the extent and ways in which the LMM  
289 service has become embedded within the early years system in Bradford (UK) to improve  
290 IMH.

291 Strengths of the outlined study are numerous, systems approaches, a defining feature of  
292 this study, are relatively new to health research and in keeping with the most recent  
293 guidance from the Medical Research Council [19]. The integration of a service into a wider  
294 system is often a key factor in the success of the service and the impact it has across the  
295 system. The approach outlined in this protocol offers a way to evaluate whether a service  
296 has become embedded and is able to influence a system. Such approaches may offer a  
297 pragmatic solution to evaluation, given there are often fluctuations in service provision and  
298 time limitations upon service providers and researchers. Furthermore, this study will  
299 provide future researchers with a valuable example of conducting such an evaluation of a  
300 service. The study findings will provide learning for the LMM service and early years  
301 commissioners in Bradford to enable them to adapt their service as required. Moreover,  
302 findings will provide a comprehensive understanding of the barriers and successes to system  
303 change for other similar services to review their practice.

304 This study may be limited as it will only describe the impact of one service on one system in  
305 one location, however the knowledge and understanding gained about IMH services will  
306 provide an evidence base for similar service development elsewhere. In particular, this  
307 study has particular relevance to the current government initiative, the best start for life [4],

308 given the focus this policy has on the first two years of life and developing strong parent-  
309 infant relationships. A further limitation is that the understanding of the pre-intervention  
310 context is being accessed retrospectively by asking participants to reflect on provision  
311 before the introduction of LMM. This may impact on the understanding that can be gained  
312 about how much change has been brought about by the LMM service into the early years  
313 system in Bradford.

## 314 **Conclusion**

315 IMH services appear to be a valuable early years service, but their efficacy depends upon  
316 becoming embedded within the wider early years system. Evaluation of this with a system  
317 approach will provide learning for these services on the challenges and successes of  
318 embedding a complex service within a healthcare system.

## 319 **References**

- 320 1. Zeanah CH, editor. Handbook of infant mental health. Guilford Publications; 2018  
321 Oct 4.
- 322 2. Fonagy P, Gergely G, Jurist EL, editors. Affect regulation, mentalization and the  
323 development of the self. Routledge; 2018 Apr 24.
- 324 3. Barlow J, Schrader-McMillan A, Axford N, Wrigley Z, Sonthalia S, Wilkinson T, et al.  
325 Attachment and attachment-related outcomes in preschool children—a review of  
326 recent evidence. Child and Adolescent Mental Health. 2016 Feb;21(1):11-20.



- 327 4. HM Government The best start for life: a vision for the 1,001 critical days: The early  
328 years healthy development review report [internet] 2021 [cited 2023 May 16].  
329 Available from: [The best start for life: a vision for the 1,001 critical days - GOV.UK](#)  
330 [www.gov.uk](http://www.gov.uk)
- 331 5. Van Ijzendoorn MH, Schuengel C, Bakermans–Kranenburg MJ. Disorganized  
332 attachment in early childhood: Meta-analysis of precursors, concomitants, and  
333 sequelae. *Development and psychopathology*. 1999 Jun;11(2):225-50.
- 334 6. Geddes H. Attachment and learning—the links between early experiences and  
335 responses in the classroom. *International Journal of Nurture in Education*.  
336 2018;4(1):15-21.
- 337 7. Mascheroni E, Ionio C. The efficacy of interventions aimed at improving post-partum  
338 bonding: a review of interventions addressing parent-infant bonding in healthy and  
339 at risk populations. *Journal of Neonatal Nursing*. 2019 Apr 1;25(2):61-8.
- 340 8. Zeanah CH, Zeanah PD. ‘Infant Mental Health: The science of Early Experience’ In:  
341 Zeanah CH, editor. *Handbook of infant mental health*. Guilford Publications; 2018  
342 Oct 4. P5-24
- 343 9. Reed J, Parish N. Working for babies. *Lockdown Lessons from Local Systems*. First.  
344 2021 Sep;1001.
- 345 10. Parent-Infant Foundation. First 1001 Days Movement: Consensus Statement.  
346 [Internet] 2020 [cited 2023 May 16]. Available from: [1001 Days - Parent-Infant](#)  
347 [Foundation \(parentinfantfoundation.org.uk\)](http://parentinfantfoundation.org.uk)

- 348 11. Parent-Infant Foundation. Parent-Infant Foundation network-locations. [Internet].  
349 London :Parent-Infant Foundation LTD; [updated 2023; cited 2023 May 16]. Available  
350 from: [Locations - Parent-Infant Foundation \(parentinfantfoundation.org.uk\)](https://parentinfantfoundation.org.uk/locations)
- 351 12. Royal College of Obstetricians and Gynaecologists. Postnatal Care, NG194. London:  
352 National Institute for Health and Care Excellence; 2021
- 353 13. Wittkowski A, Vatter S, Muhinyi A, Garrett C, Henderson M. Measuring bonding or  
354 attachment in the parent-infant-relationship: A systematic review of parent-report  
355 assessment measures, their psychometric properties and clinical utility. Clinical  
356 Psychology Review. 2020 Dec 1;82:101906.
- 357 14. Bird PK, Hindson Z, Dunn A, de Chavez AC, Dickerson J, Howes J, et al. Implementing  
358 the Maternal Postnatal Attachment Scale (MPAS) in universal services: Qualitative  
359 interviews with health visitors. medRxiv. 2021 Nov 30:2021-11.
- 360 15. Better Start Bradford Giving children the best start in life [Internet]. Bradford: Better  
361 Start Bradford.org; [updated 2023; cited 2023 May 16] Available from: [Home |](#)  
362 [Better Start Bradford](#)
- 363 16. Abbas S. Reducing inequalities in communities: closing the health gap in central  
364 Bradford. 2022 May 25 [cited 2023 May 25]. In: NHS England Website. Blogs  
365 [Internet]. London: NHS England. Available from: [NHS England » Reducing](#)  
366 [inequalities in communities: closing the health gap in central Bradford](#)

- 367 17. Better Care Network. Practitioner Library: Human Resources [Internet]. Better Care  
368 Network.org: [updated 2022; cited 2023 May 16]. Available from: [Parents and](#)  
369 [Caregivers \(bettercarenetwork.org\)](#)
- 370 18. Meins E. Security of attachment and the social development of cognition. Hove, UK:  
371 Lawrence Erlbaum Associates: 1997.
- 372 19. Skivington K, Matthews L, Simpson SA, Craig P, Baird J, Blazeby JM, et al. A new  
373 framework for developing and evaluating complex interventions: update of Medical  
374 Research Council guidance. *bmj*. 2021 Sep 30;374.
- 375 20. Hawe P, Shiell A, Riley T. Theorising interventions as events in systems. *American*  
376 *journal of community psychology*. 2009 Jun;43:267-76.
- 377 21. Tong A, Sainsbury P, Craig J. Consolidated criteria for reporting qualitative research  
378 (COREQ): a 32-item checklist for interviews and focus groups. *Int J Qual Health Care*.  
379 *2007;19(6):349-357*.
- 380 22. Gale NK, Heath G, Cameron E, Rashid S, Redwood S. Using the framework method  
381 for the analysis of qualitative data in multi-disciplinary health research. *BMC medical*  
382 *research methodology*. 2013 Dec;13(1):1-8.

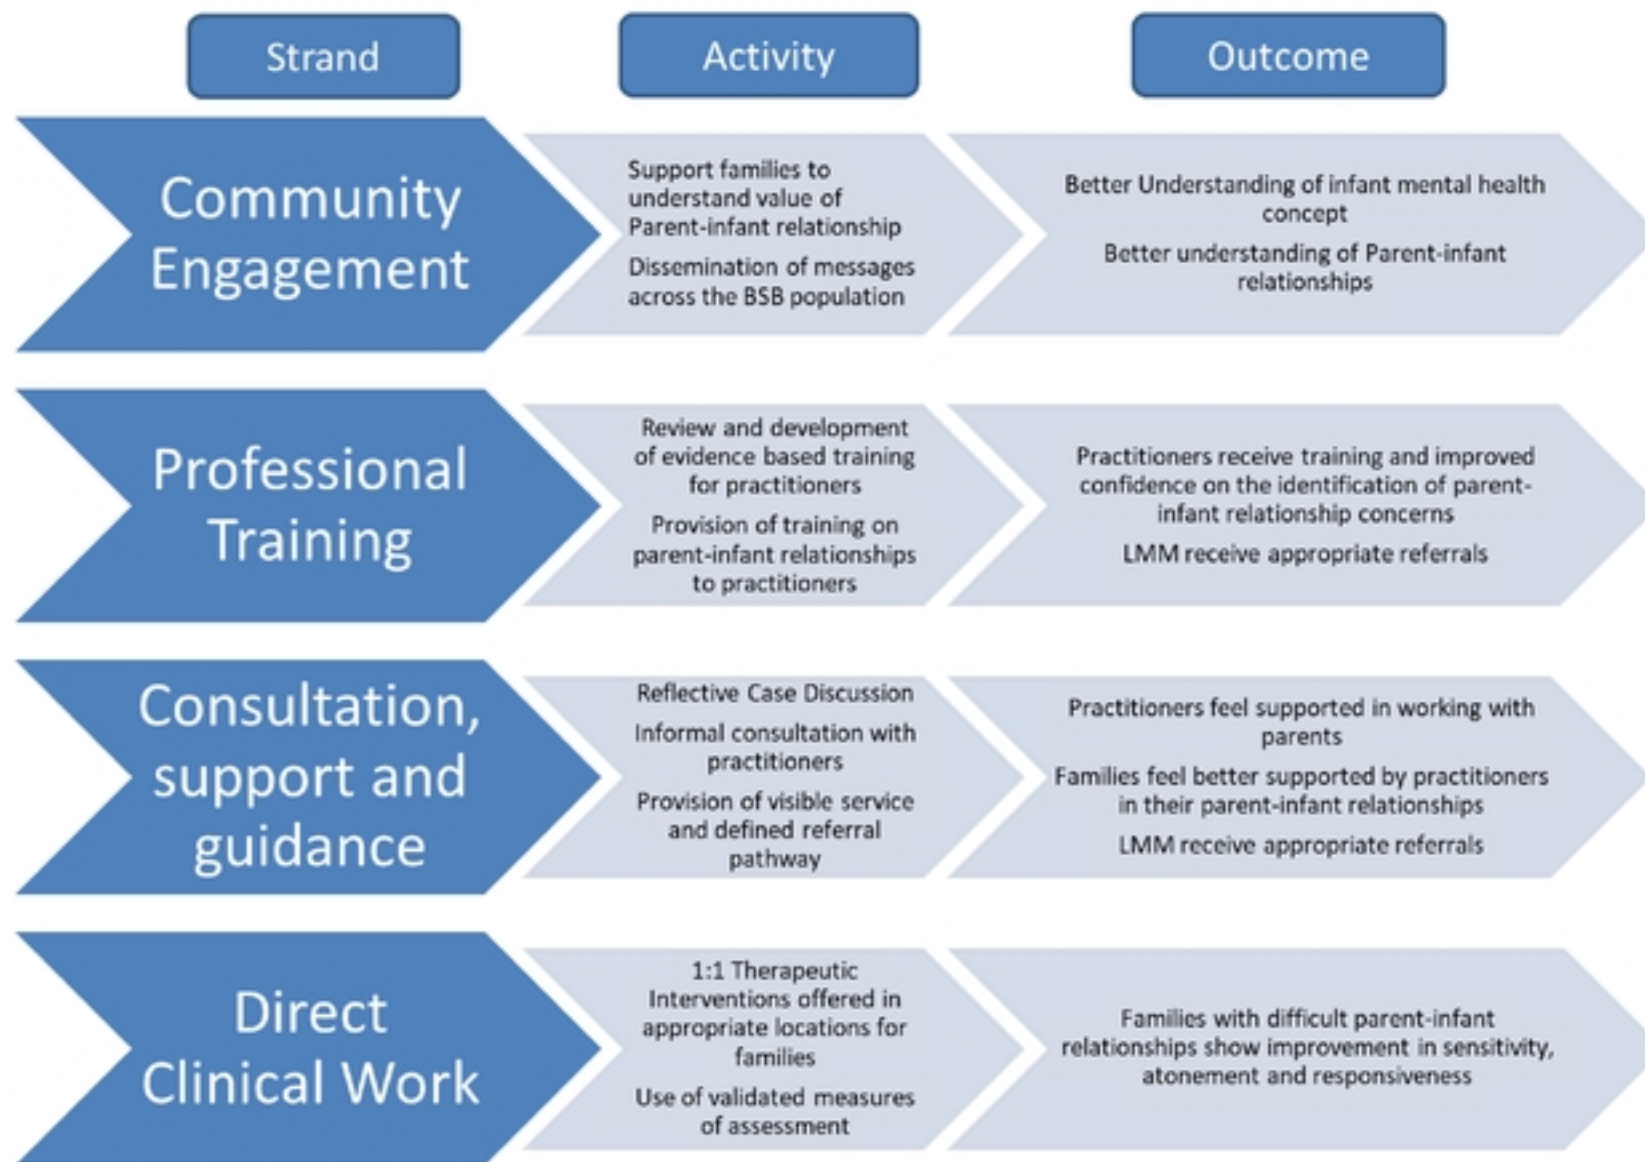

Fig 1. Overview of Little Minds Matter service

VCS Voluntary and Charitable Sector service  
 P Private service  
 S Statutory service  
 BSB Better Start Bradford service

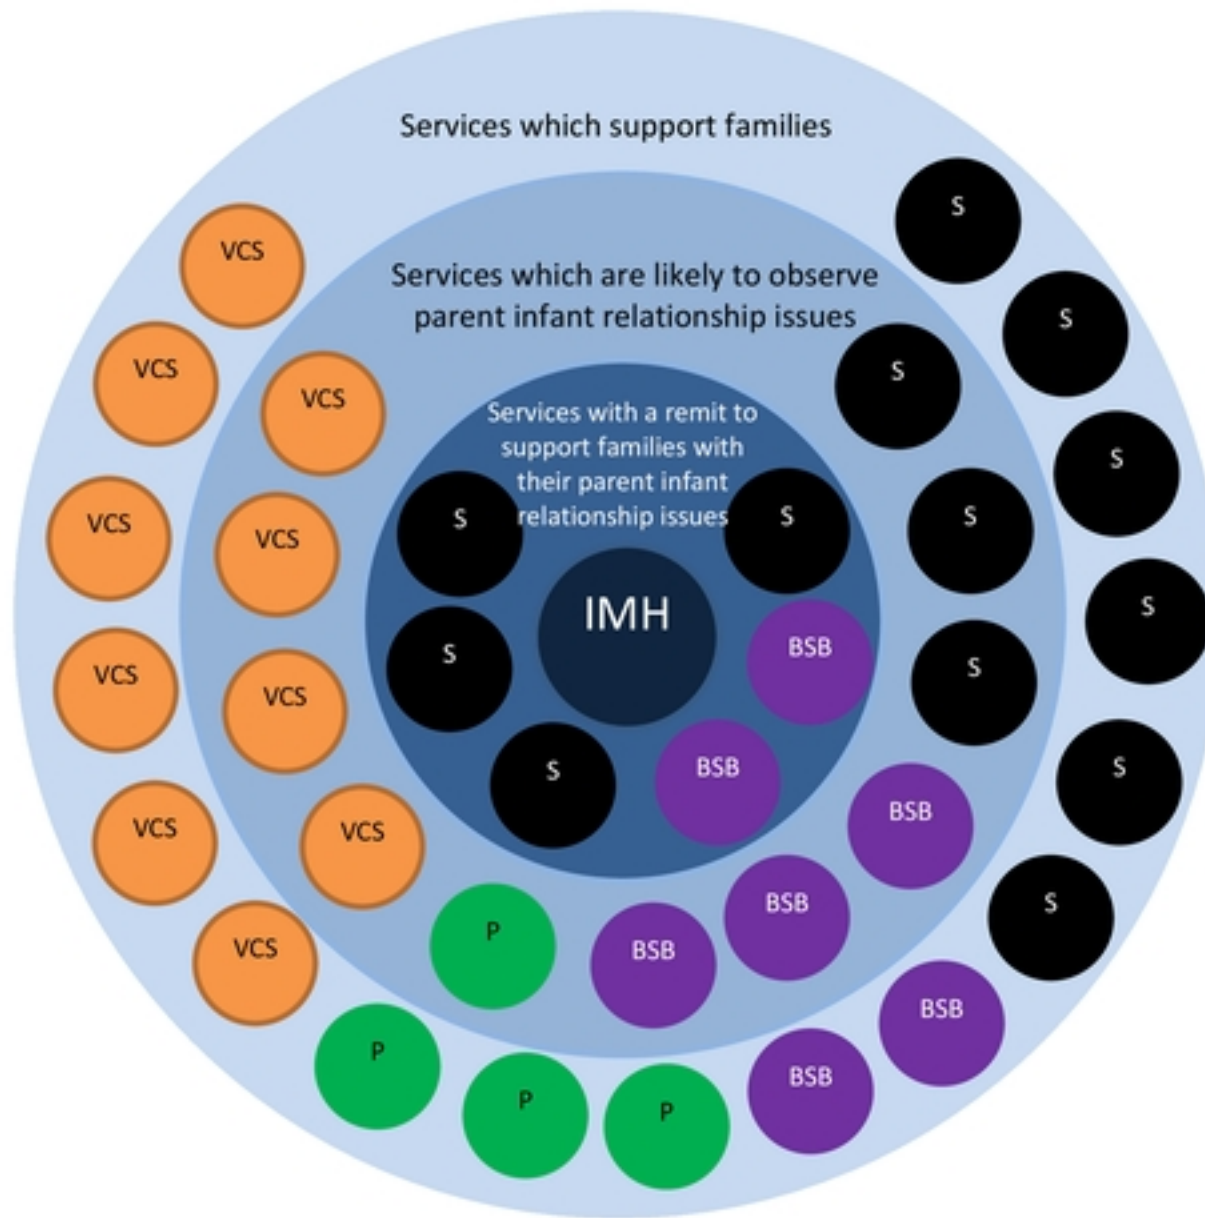

Fig 2. Example template map

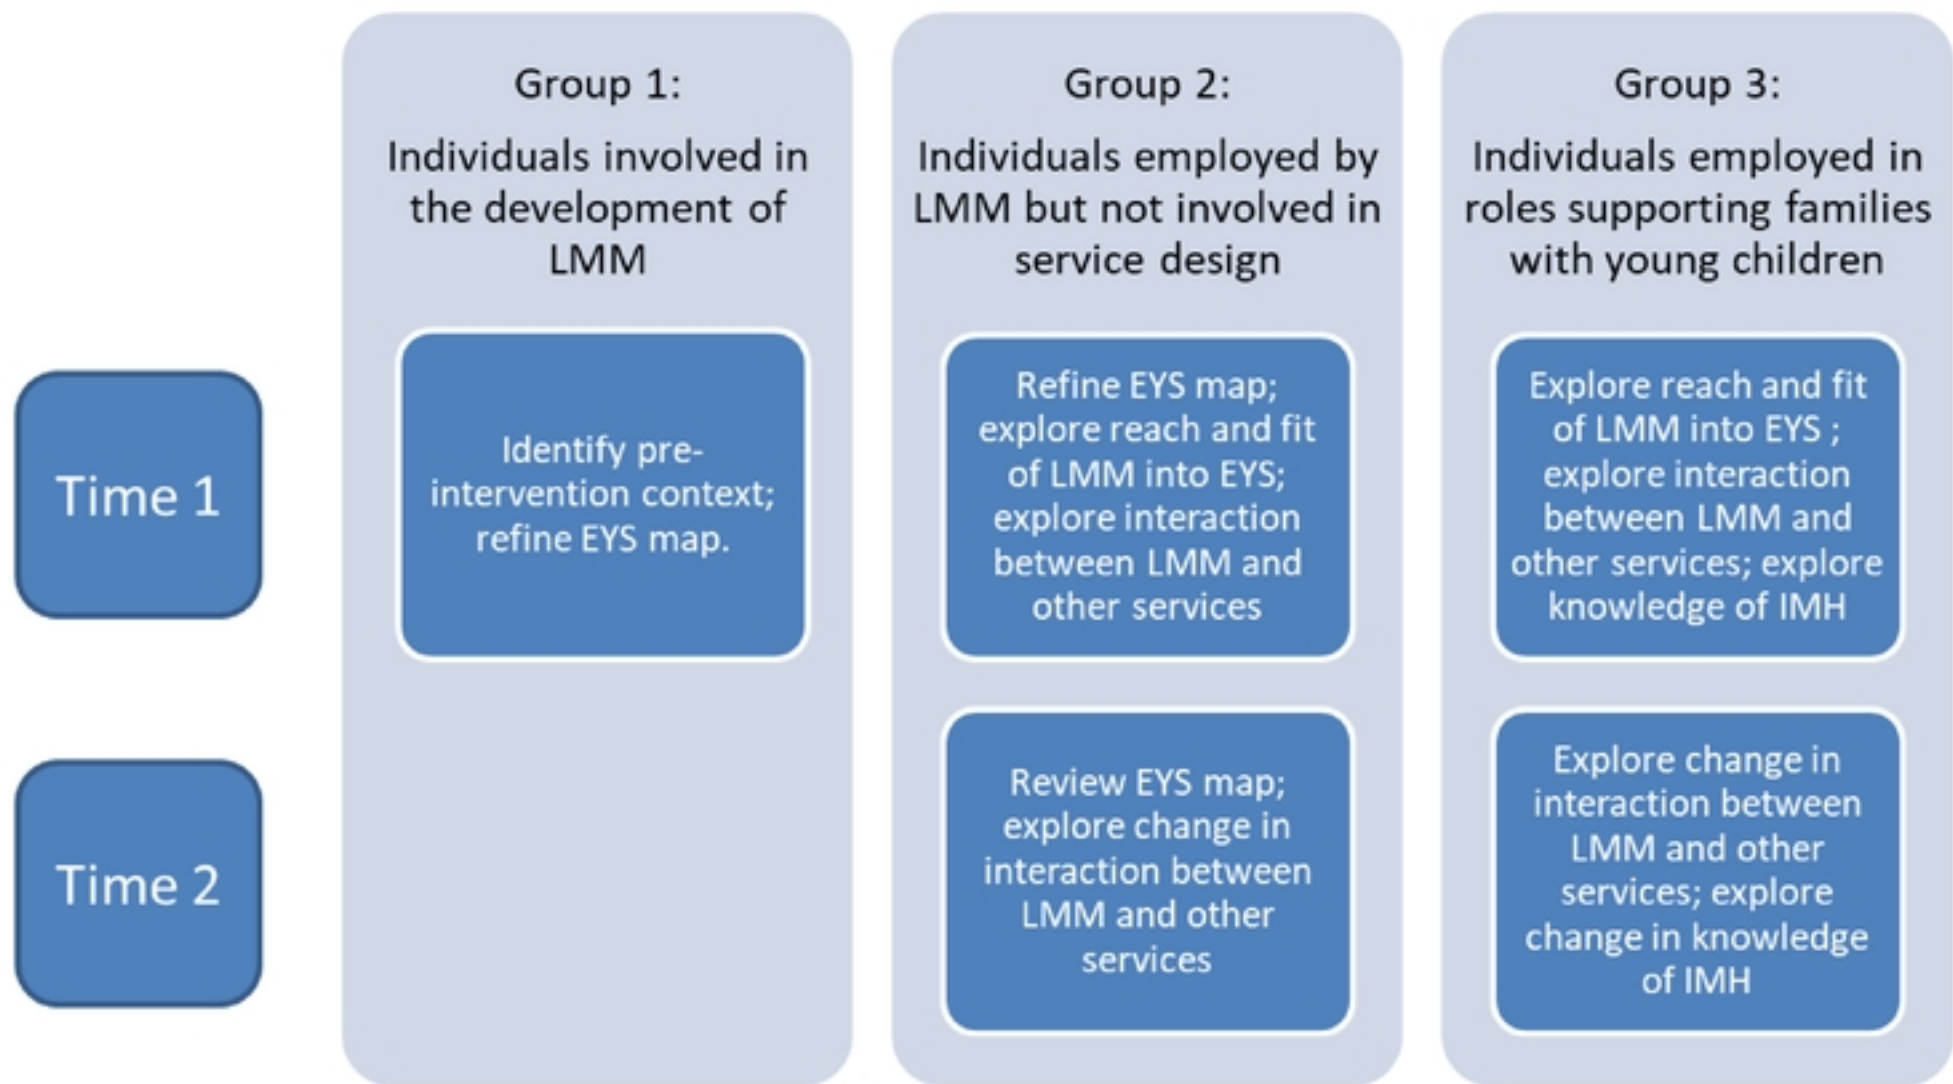

Fig 3. Data collection process
